# Supplementary material
Source: publisher figshare collection journal article supplement (https://springernature.figshare.com/ndownloader/files/21105672)
Supplement: Supplementary file [file 21105672]

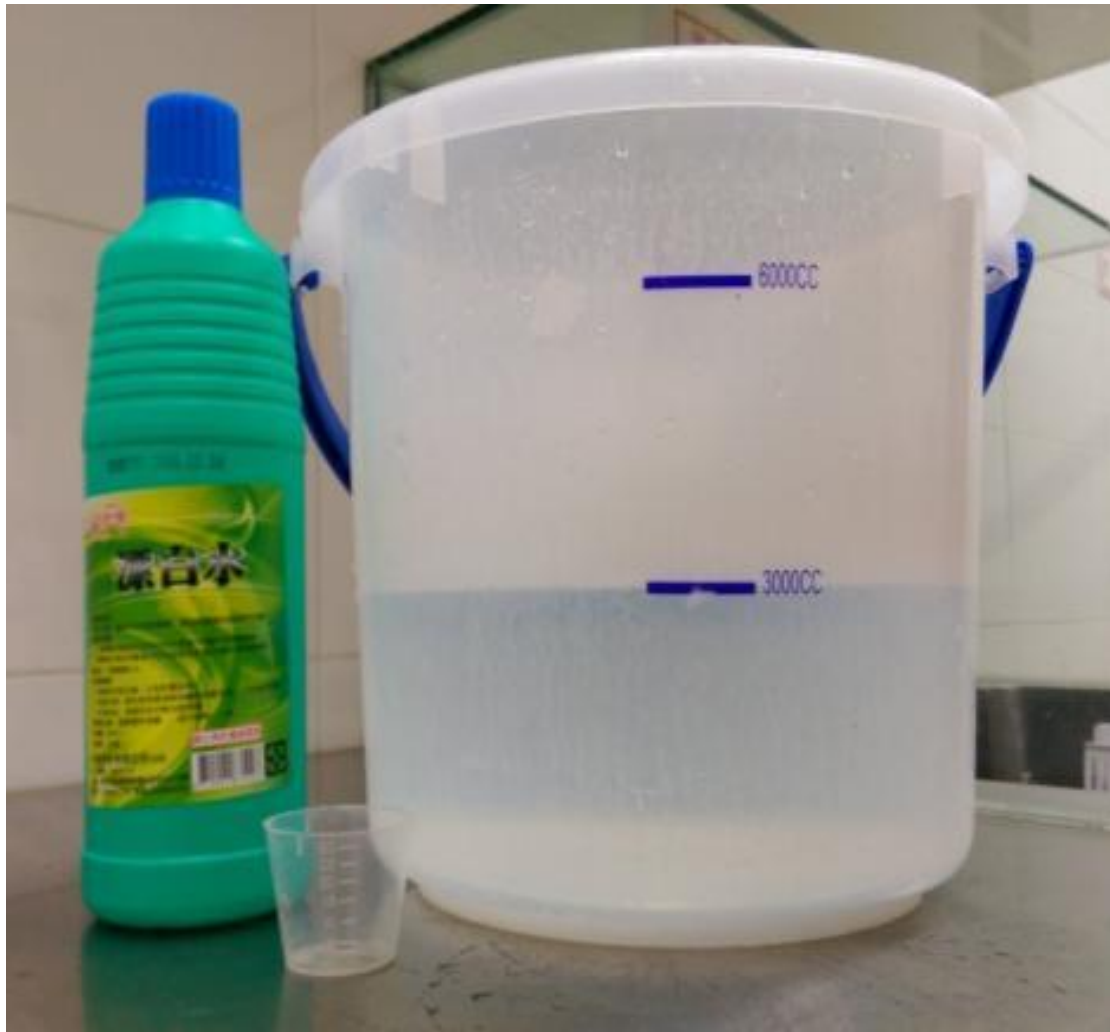

Additional file 1. The regular method of bleach dilution. The bleach was diluted with cold water using the uniform containers by the environmental service workers.
